# Supplementary material for: Oesophageal pressure as a surrogate of pleural pressure in mechanically ventilated patients
Source: PubMed Central journal article supplement — ERJ Open Res. 2021 Mar 8;7(1):00646-2020. doi: 10.1183/23120541.00646-2020 (PMC7938048; doi:10.1183/23120541.00646-2020), 2021-03-08

### Supplementary Figure 1

Picture of positioning of pleural catheters during surgery and corresponding post-operative CT-scan in one patient.

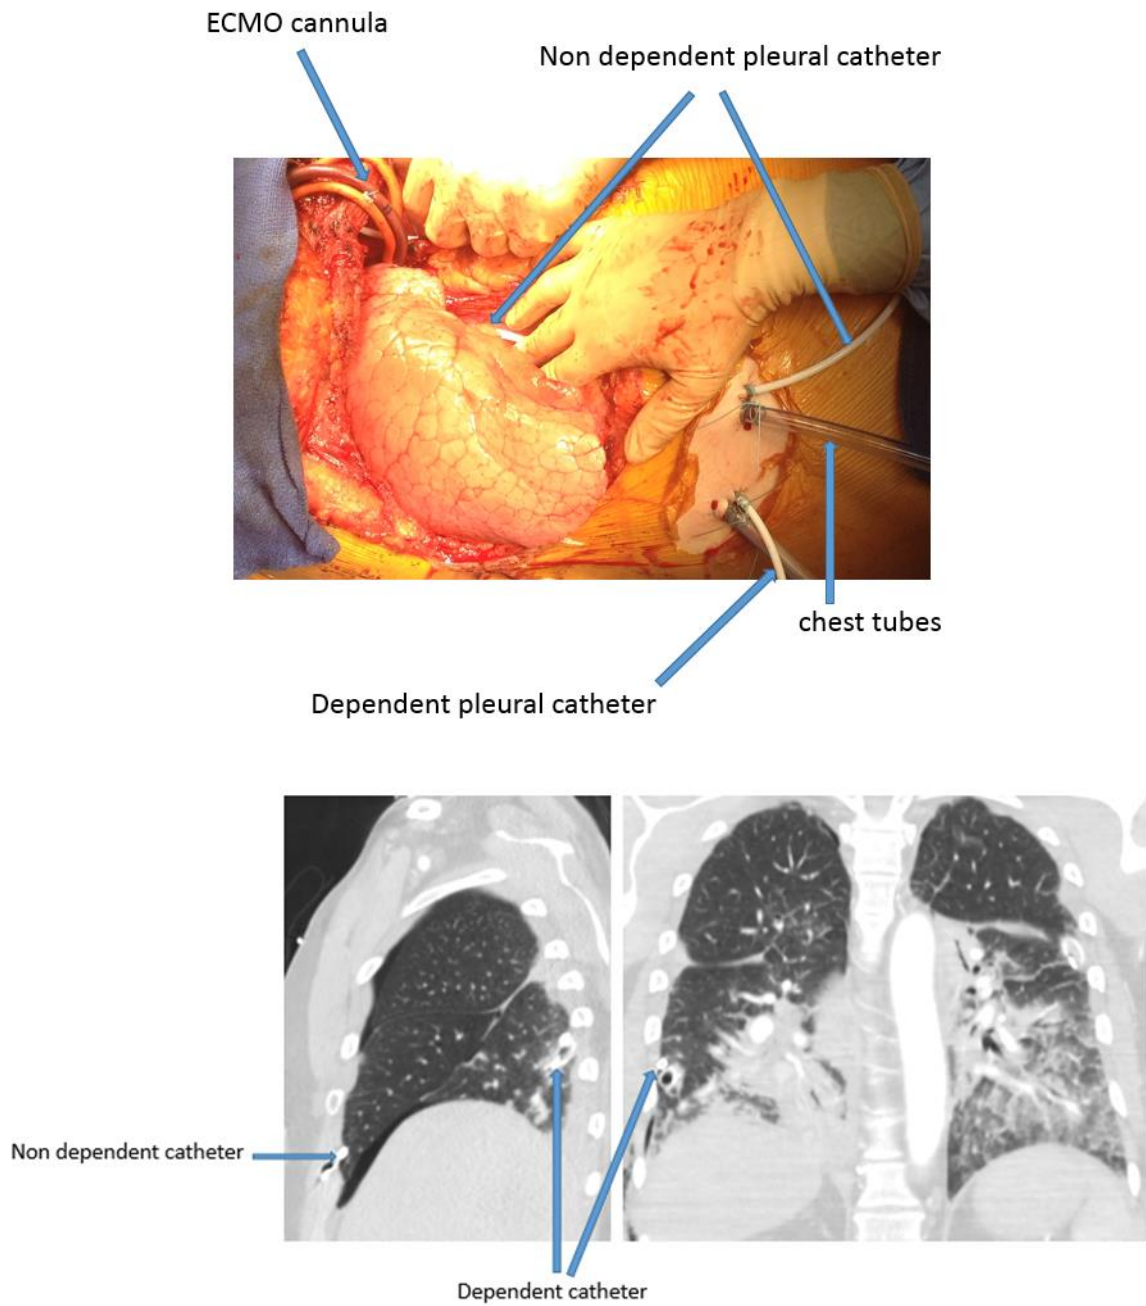

Supplement: 00646-2020.SUPPLEMENT.pdf [file 00646-2020.SUPPLEMENT.pdf]
